# Supplementary material for: Effects of Habitual Physical Activity and Fitness on Tibial Cortical Bone Mass, Structure and Mass Distribution in Pre-pubertal Boys and Girls: The Look Study
Source: Springer Nature journal article supplement (doi:10.1007/s00223-016-0128-4), 2016-03-16
Supplement: MOESM1 [file 8166836]

**Supplementary Table 1:** Correlations showing the relationship between PA and the various fitness measures with the bone traits in boys (a) and girls (b).

a.

|  |  | **Pedometer PA** | **Power** | **CRF** | **CTh** | **MeA** | **CoA** | **ToA** | **Sector1** | **Sector2** | **Sector3** | **Sector4** | **Sector5** | **Sector6** |
| --- | --- | --- | --- | --- | --- | --- | --- | --- | --- | --- | --- | --- | --- | --- |
| **Pedometer PA** | Pearson Correlation |  | 0.092 | 0.238** | 0.053 | 0.034 | 0.095 | 0.065 | 0.091 | 0.167 | 0.017 | 0.097 | 0.121 | 0.093 |
| Sig. (2-tailed) |  | 0.156 | <0.001 | 0.408 | 0.598 | 0.14 | 0.313 | 0.158 | 0.009 | 0.794 | 0.131 | 0.061 | 0.148 |
| N |  | 241 | 237 | 241 | 241 | 241 | 241 | 241 | 241 | 241 | 241 | 241 | 241 |
| **Power** | Pearson Correlation | 0.092 |  | .197** | .325** | .370** | .664** | .567** | 0.629 | 0.426 | 0.626 | 0.588 | 0.556 | 0.62 |
| Sig. (2-tailed) | 0.156 |  | 0.002 | <0.001 | <0.001 | <0.001 | <0.001 | <0.001 | <0.001 | <0.001 | <0.001 | <0.001 | <0.001 |
| N | 241 |  | 237 | 241 | 241 | 241 | 241 | 241 | 241 | 241 | 241 | 241 | 241 |
| **CRF** | Pearson Correlation | .238** | .197** |  | .201** | -0.065 | .172** | 0.009 | 0.118 | 0.079 | 0.145 | 0.074 | 0.17 | 0.157 |
| Sig. (2-tailed) | 0 | 0.002 |  | 0.002 | 0.317 | 0.008 | 0.891 | 0.071 | 0.228 | 0.025 | 0.256 | 0.009 | 0.015 |
| N | 237 | 237 |  | 237 | 237 | 237 | 237 | 237 | 237 | 237 | 237 | 237 | 237 |

b.

|  |  | **Pedometer PA** | **Power** | **CRF** | **CTh** | **MeA** | **CoA** | **ToA** | **Sector1** | **Sector2** | **Sector3** | **Sector4** | **Sector5** | **Sector6** |
| --- | --- | --- | --- | --- | --- | --- | --- | --- | --- | --- | --- | --- | --- | --- |
| **Pedometer PA** | Pearson Correlation |  | -0.034 | .302** | 0.012 | -0.026 | -0.014 | -0.027 | -0.008 | 0.038 | -0.041 | 0.001 | -0.074 | 0.001 |
| Sig. (2-tailed) |  | 0.598 | <0.001 | 0.848 | 0.687 | 0.823 | 0.673 | 0.901 | 0.556 | 0.518 | 0.99 | 0.249 | 0.986 |
| N |  | 245 | 245 | 245 | 245 | 245 | 245 | 245 | 245 | 245 | 245 | 245 | 245 |
| **Power** | Pearson Correlation | -0.034 |  | 0.002 | .241** | .459** | .632** | .620** | .630** | .311** | .592** | .591** | .510** | .554** |
| Sig. (2-tailed) | 0.598 |  | 0.978 | <0.001 | <0.001 | <0.001 | <0.001 | <0.001 | <0.001 | <0.001 | <0.001 | <0.001 | <0.001 |
| N | 245 |  | 245 | 245 | 245 | 245 | 245 | 245 | 245 | 245 | 245 | 245 | 245 |
| **CRF** | Pearson Correlation | .302** | 0.002 |  | -0.098 | 0.015 | -0.092 | -0.021 | -0.028 | 0.003 | -0.082 | -0.08 | -0.086 | -0.105 |
| Sig. (2-tailed) | 0 | 0.978 |  | 0.127 | 0.812 | 0.151 | 0.745 | 0.661 | 0.966 | 0.199 | 0.212 | 0.181 | 0.1 |
| N | 245 | 245 |  | 245 | 245 | 245 | 245 | 245 | 245 | 245 | 245 | 245 | 245 |

** Correlation is significant at the 0.01 level (2-tailed), * Correlation is significant at the 0.05 level (2-tailed).
